# Supplementary material for: A Label-Free Proteomic Strategy to Investigate the Intramuscular fat Proteomic Differences Between Biceps Femoris and Longissimus Dorsi in Inner Mongolian Cashmere Goats
Source: Research Square preprint supplement (doi:10.21203/rs.3.rs-131926/v1), 2020-12-21
Supplement: Supplementary file 1 [file 53187c618b3cafcbe0602a98.docx]

Fig. 4. Protein-protein interaction network of differentially expressed proteins.

“ ” denotes downregulated proteins, and “ ” denotes upregulated proteins. The Lines “ ” indicate that there was an interaction from source protein to target protein.
